# Supplementary material for: Evidence based guidelines for the treatment of Helicobacter pylori infection in Korea 2020
Source: PubMed Central journal article supplement — Korean J Intern Med. 2021 Jun 8;36(4):807–38. doi: 10.3904/kjim.2020.701 (PMC8273819; doi:10.3904/kjim.2020.701), 2021-06-08
Supplement: kjim-2020-701-suppl1.pdf [file kjim-2020-701-suppl1.pdf]

**Supplementary Table 1. Studies included in meta-analysis about the efficacy of *Helicobacter pylori* eradication after endoscopic resection of gastric adenoma**

| Study                   | Design              | Characteristic                                                 | Intervention                 | Control                        | Outcome                     |
|-------------------------|---------------------|----------------------------------------------------------------|------------------------------|--------------------------------|-----------------------------|
| Chon et al. (2013) [36] | Retrospective study | Patients with gastric dysplasia undergone endoscopic resection | Successful eradication       | Persistent infection           | Metachronous dysplasia      |
| Shin et al. (2015) [35] | Retrospective study | Patients with gastric dysplasia undergone endoscopic resection | Eradicated group             | Non-eradicated or failed group | Metachronous dysplasia      |
| Song et al. (2017) [34] | Retrospective study | Patients with gastric dysplasia undergone endoscopic resection | Eradicated group             | Non-eradicated group           | Metachronous neoplasm       |
| Choi et al. (2018) [31] | Randomized study    | Patients with gastric dysplasia undergone endoscopic resection | <i>H. pylori</i> eradication | Placebo                        | Metachronous gastric cancer |
| Choi et al. (2018) [33] | Prospective study   | Patients with gastric dysplasia undergone endoscopic resection | <i>H. pylori</i> eradication | Placebo                        | Metachronous gastric cancer |
