# Supplementary material for: Evidence based guidelines for the treatment of Helicobacter pylori infection in Korea 2020
Source: PubMed Central journal article supplement — Korean J Intern Med. 2021 Jun 8;36(4):807–38. doi: 10.3904/kjim.2020.701 (PMC8273819; doi:10.3904/kjim.2020.701), 2021-06-08
Supplement: kjim-2020-701-suppl2.pdf [file kjim-2020-701-suppl2.pdf]

**Supplementary Table 2. Studies included in meta-analysis about the efficacy of *Helicobacter pylori* eradication in patients with functional dyspepsia**

| Study                                    | Design           | Characteristic                                     | Intervention                 | Control      | Outcome                 |
|------------------------------------------|------------------|----------------------------------------------------|------------------------------|--------------|-------------------------|
| Ang et al. (2006) [53]                   | Randomized trial | Dyspepsia patients with <i>H. pylori</i> infection | <i>H. pylori</i> eradication | Prokinetics  | Symptom relief at 52 wk |
| Blum et al. (1998) [41]                  | Randomized trial | Dyspepsia patients with <i>H. pylori</i> infection | <i>H. pylori</i> eradication | Omeprazole   | Symptom relief at 12 mo |
| Chiba et al. (2002) [48]                 | Randomized trial | Dyspepsia patients with <i>H. pylori</i> infection | <i>H. pylori</i> eradication | Omeprazole   | Symptom relief at 12 mo |
| Froehlich et al. (2001) [47]             | Randomized trial | Dyspepsia patients with <i>H. pylori</i> infection | <i>H. pylori</i> eradication | Lansoprazole | Symptom relief at 12 mo |
| Gisbert et al. (2004) [51]               | Randomized trial | Dyspepsia patients with <i>H. pylori</i> infection | <i>H. pylori</i> eradication | Ranitidine   | Symptom relief at 12 mo |
| Gwee et al. (2009) [54]                  | Randomized trial | Dyspepsia patients with <i>H. pylori</i> infection | <i>H. pylori</i> eradication | Placebo      | Symptom relief at 12 mo |
| Hsu et al. (2001) [45]                   | Randomized trial | Dyspepsia patients with <i>H. pylori</i> infection | <i>H. pylori</i> eradication | Lansoprazole | Symptom relief at 12 mo |
| Koskenpato et al. (2001) [44]            | Randomized trial | Dyspepsia patients with <i>H. pylori</i> infection | <i>H. pylori</i> eradication | Omeprazole   | Symptom relief at 12 mo |
| Malfertheiner et al. (2003) [50]         | Randomized trial | Dyspepsia patients with <i>H. pylori</i> infection | <i>H. pylori</i> eradication | Lansoprazole | Symptom relief at 12 mo |
| Mazzoleni et al. (2006) [52]             | Randomized trial | Dyspepsia patients with <i>H. pylori</i> infection | <i>H. pylori</i> eradication | Lansoprazole | Symptom relief at 12 mo |
| Mazzoleni et al. (2011) [55]             | Randomized trial | Dyspepsia patients with <i>H. pylori</i> infection | <i>H. pylori</i> eradication | Placebo      | Symptom relief at 12 mo |
| McCull et al. (1998) [40]                | Randomized trial | Dyspepsia patients with <i>H. pylori</i> infection | <i>H. pylori</i> eradication | Omeprazole   | Symptom relief at 12 mo |
| Sodhi et al. (2013) [56]                 | Randomized trial | Dyspepsia patients with <i>H. pylori</i> infection | <i>H. pylori</i> eradication | Omeprazole   | Symptom relief at 12 mo |
| Talley et al. (1999) [42]                | Randomized trial | Dyspepsia patients with <i>H. pylori</i> infection | <i>H. pylori</i> eradication | Placebo      | Symptom relief at 12 mo |
| Talley et al. (1999; ORCHID) [43]        | Randomized trial | Dyspepsia patients with <i>H. pylori</i> infection | <i>H. pylori</i> eradication | Placebo      | Symptom relief at 12 mo |
| Bruley Des Varannes et al. (2001) [46]   | Randomized trial | Dyspepsia patients with <i>H. pylori</i> infection | <i>H. pylori</i> eradication | Placebo      | Symptom relief at 12 mo |
| Yazdanbod et al. (2015) [57]             | Randomized trial | Dyspepsia patients with <i>H. pylori</i> infection | <i>H. pylori</i> eradication | Omeprazole   | Symptom relief at 12 mo |
| Veldhuyzen van Zanten et al. (2003) [49] | Randomized trial | Dyspepsia patients with <i>H. pylori</i> infection | <i>H. pylori</i> eradication | Placebo      | Symptom relief at 12 mo |
