# Supplementary material for: Evidence based guidelines for the treatment of Helicobacter pylori infection in Korea 2020
Source: PubMed Central journal article supplement — Korean J Intern Med. 2021 Jun 8;36(4):807–38. doi: 10.3904/kjim.2020.701 (PMC8273819; doi:10.3904/kjim.2020.701), 2021-06-08
Supplement: kjim-2020-701-suppl3.pdf [file kjim-2020-701-suppl3.pdf]

**Supplementary Table 3. Evidence table about the eradication rate of standard triple therapy in *Helicobacter pylori* infection**

| Study                    | Indication           | Subjects no. | Eradication regimen                                                 | Confirmative test | Eradication rate ITT                                                                                          | Eradication rate PP                                                                                           |
|--------------------------|----------------------|--------------|---------------------------------------------------------------------|-------------------|---------------------------------------------------------------------------------------------------------------|---------------------------------------------------------------------------------------------------------------|
| Choi et al. (2007) [65]  | PU, NUD              | 576          | OAC7-148<br>PAC7-140<br>RAC7-140<br>EAC7-148<br>TOTAL-576           | CLO,<br>Histology | OAC7-64.9 (96/148)<br>PAC7-69.3 (97/140)<br>RAC7-69.3 (97/140)<br>EAC7-70.3 (104/148)<br>TOTAL-68.4 (394/576) | OAC7-80.7 (96/119)<br>PAC7-76.9 (97/121)<br>RAC7-81.5 (97/119)<br>EAC7-82.6 (104/121)<br>TOTAL-82.1 (394/480) |
| Kim et al. (2007) [66]   | PU                   | 598          | PAC7-337<br>PAC14-261                                               | UBT               | PAC7-71.2 (240/337)<br>PAC14-75.5 (197/261)                                                                   | PAC7-83.6 (239/286)<br>PAC14-86.6 (194/224)                                                                   |
| Kim et al. (2008) [68]   | PU                   | 463          | LFT7-115<br>LFT14-117<br>LAC7-119<br>LAC14-112                      | UBT               | LFT7-76.5 (88/115)<br>LFT14-76.9 (90/117)<br>LAC7-78.2 (93/119)<br>LAC14-80.4 (90/112)                        | LFT7-81.6 (80/98)<br>LFT14-82.0 (73/89)<br>LAC7-82.2 (83/101)<br>LAC14-85.9 (79/92)                           |
| Kim et al. (2008) [67]   | PUD, NUD             | 186          | OAC14-93<br>OAC(QID)14-93                                           | UBT, CLO          | OAC14-91.4 (85/93)<br>OAC(QID)14-89.2 (83/93)                                                                 | OAC14-92.1 (82/89)<br>OAC(QID)14-90.8 (79/87)                                                                 |
| Kim et al. (2008) [70]   | HP infected patients | 347          | PAC7-179<br>PAC7 + YOGT-168                                         | UBT               | PAC7-72.1 (129/179)<br>PAC7 + YOGT-79.2 (133/168)                                                             | PAC7-78.7 (129/164)<br>PAC7 + YOGT-87.5 (133/152)                                                             |
| Choi et al. (2008) [69]  | HP infected patients | 158          | OAC7-81<br>SEQ10-77                                                 | UBT               | OAC7-71.6 (58/81)<br>SEQ10-77.9 (60/77)                                                                       | OAC7-76.6 (58/76)<br>SEQ10-85.7 (60/70)                                                                       |
| Jung et al. (2008) [71]  | PUD                  | 38           | OAC7 + O3WK-14<br>OAC7-12<br>O3WK + OAC7-12                         | CLO,<br>Histology | OAC7 + O3WK-14-50.0 (7/14)<br>OAC7-12-66.7 (8/12)<br>O3WK + OAC7-75.0 (9/12)                                  | OAC7 + O3WK-87.5 (7/8)<br>OAC7-80.0 (8/10)<br>O3WK + OAC7-90.0 (9/10)                                         |
| Kim et al. (2008) [72]   | HP infected patients | 257          | LAC7-129<br>LAC7 + ECABET-128                                       | UBT               | LAC7-72.1 (93/129)<br>LAC7 + ECABET-78.9 (101/128)                                                            | LAC7-78.8 (93/118)<br>LAC7 + ECABET-88.6 (101/114)                                                            |
| Song et al. (2010) [74]  | HP infected patients | 991          | PAC7-331<br>PAC7 + PROB-330<br>PAC7 + PROB + MUCOPRO<br>TECTIVE-330 | UBT               | PAC7-71.6 (237/331)<br>PAC7 + PROB-80.0 (264/330)<br>PAC7 + PROB + MUCOPRO<br>TECTIVE-82.1 (271/330)          | PAC7-80.0 (237/296)<br>PAC7 + PROB-85.4 (264/309)<br>PAC7 + PROB + MUCOPRO<br>TECTIVE-84.9 (271/319)          |
| Lee et al. (2010) [73]   | HP infected patients | 492          | LAC7-247<br>RAC7-245                                                | UBT               | LAC7-74.9 (185/247)<br>RAC7-66.5 (163/245)<br>TOTAL-70.7 (348/492)                                            | LAC7-79.1 (185/234)<br>RAC7-71.2 (163/229)<br>TOTAL-75.2 (348/463)                                            |
| Kim et al. (2011) [75]   | HP infected patients | 409          | PAC14-204<br>SEQ10-205                                              |                   | PAC14-75.0 (153/204)<br>SEQ10-85.9 (176/205)                                                                  | PAC14-85.0 (153/180)<br>SEQ10-92.6 (176/190)                                                                  |
| Choi et al. (2011) [76]  | PUD                  | 363          | OAC7-99<br>OAL7-98<br>OALR7-98                                      |                   | OAC7-77.8 (77/99)<br>OAL7-65.3 (64/98)<br>OALR7-74.5 (73/98)                                                  | OAC7-85.6 (77/90)<br>OAL7-73.6 (64/87)<br>OALR7-80.2 (73/91)                                                  |
| Chung et al. (2012) [77] | PUD                  | 159          | OAC10-80<br>SEQ10-79                                                |                   | OAC10-58.7 (47/80)<br>SEQ10-75.9 (60/79)                                                                      | OAC10-67.6 (46/68)<br>SEQ10-86.8 (59/68)                                                                      |
| Choi et al. (2012) [78]  | PUD                  | 460          | RAC7-115<br>RAC10-115<br>RAC14-115<br>SEQ10-115                     | UBT,<br>Histology | RAC7-70.4 (81/115)<br>RAC10-74.7 (86/115)<br>RAC14-80.0 (92/115)<br>SEQ10-75.6 (87/115)                       | RAC7-75.7 (81/107)<br>RAC10-81.9 (86/105)<br>RAC14-84.4 (92/109)<br>SEQ10-82.0 (87/106)                       |

Supplementary Table 3. Continued

| Study                    | Indication                | Subjects no. | Eradication regimen                             | Confirmative test   | Eradication rate ITT                                                                        | Eradication rate PP                                                                         |
|--------------------------|---------------------------|--------------|-------------------------------------------------|---------------------|---------------------------------------------------------------------------------------------|---------------------------------------------------------------------------------------------|
| Park et al. (2012) [79]  | HP infected patients      | 348          | SEQ10-162<br>RAC7-164                           |                     | SEQ10-77.8 (126/162)<br>RAC7-62.2 (102/164)                                                 | SEQ10-87.9 (126/132)<br>RAC7-76.0 (102/125)                                                 |
| Oh et al. (2012) [80]    | PUD, HP infected patients | 246          | SEQ10-116<br>RAC7-130                           |                     | SEQ10-79.3 (92/116)<br>RAC7-63.0 (82/130)                                                   | SEQ10-81.9 (91/111)<br>RAC7-64.5 (82/127)                                                   |
| Kim et al. (2012) [81]   | PUD                       | 208          | LAC14-104<br>LA(TID)14-104                      | UBT, CLO            | LAC14-74.0 (77/104)<br>LA(TID)14-67.3 (70/104)                                              | LAC14-82.8 (77/93)<br>LA(TID)14-78.4 (69/88)                                                |
| Lee et al. (2013) [82]   | PUD                       | 1232         | TAILORED-218<br>RAC7-308<br>RAM7-308            | UBT                 | TAILORED-80.7 (176/218)<br>RAC7-69.5 (214/308)<br>RAM7-71.1 (219/308)                       | TAILORED-91.2 (176/193)<br>RAC7-75.9 (214/282)<br>RAM7-79.1 (219/277)                       |
| Kim et al. (2013) [83]   | PUD                       | 270          | LAC7-135<br>CONCO5-135                          | UBT                 | LAC7-72.6 (98/135)<br>CONCO5-80.7 (109/135)                                                 | LAC7-85.2 (98/115)<br>CONCO5-91.4 (106/116)                                                 |
| Heo et al. (2014) [84]   | PUD                       | 348          | LAC10-174<br>CONCO10-174                        | UBT                 | LAC10-70.7 (123/174)<br>CONCO10-78.7 (137/174)                                              | LAC10-78.4 (120/153)<br>CONCO10-88.7 (133/150)                                              |
| Park et al. (2014) [85]  | EGC, dysplasia            | 114          | PAC7-57<br>PRE-SUSCEP-57                        | UBT                 | PAC7-71.9 (41/57)<br>PRE-SUSCEP-94.7 (54/57)                                                | PAC7-73.2 (41/56)<br>PRE-SUSCEP-96.4 (54/56)                                                |
| Lee et al. (2014) [86]   | PUD, NUD, GC              | 332          | PAC7-115<br>SEQ10-111<br>SEQ15-106              | UBT, CLO            | PAC7-64.3 (74/115)<br>SEQ10-72.1 (80/111)<br>SEQ15-80.2 (85/106)                            | PAC7-68.5 (74/108)<br>SEQ10-78.4 (80/102)<br>SEQ15-89.5 (85/95)                             |
| Lee et al. (2015) [87]   | PUD, HP gastritis         | 680          | PAC7-170<br>PAM7-170<br>SEQ10-170<br>CONCO7-170 | UBT                 | PAC7-64.1 (109/170)<br>PAM7-68.8 (117/170)<br>SEQ10-70.7 (119/170)<br>CONCO7-79.4 (135/170) | PAC7-76.2 (109/143)<br>PAM7-84.2 (117/139)<br>SEQ10-70.7 (119/170)<br>CONCO7-79.4 (135/143) |
| Bang et al. (2015) [88]  | PUD, NUD                  | 112          | PAC7-55<br>PAC7 + PRONASE-57                    | UBT                 | PAC7-76.4 (42/55)<br>PAC7 + PRO-NASE-56.1 (32/57)                                           | PAC7-87.5 (42/48)<br>PAC7 + PRONASE-68.1 (32/47)                                            |
| Chung et al. (2016) [89] | PUD, EGC, MALT lymphoma   | 517          | PAC10-171<br>SEQ10-170<br>CONCO10-176           |                     | PAC10-83.0 (142/171)<br>SEQ10-88.8 (151/170)<br>CONCO10-93.2 (164/176)                      | PAC10-82.8 (106/128)<br>SEQ10-89.5 (119/133)<br>CONCO10-94.4 (135/143)                      |
| Kim et al. (2016) [90]   | PUD                       | 601          | PAC7-295<br>SEQ5-306                            | UBT, CLO, histology | PAC7-70.8 (209/295)<br>SEQ5-82.4 (252/306)                                                  | PAC7-76.9 (206/268)<br>SEQ5-88.8 (247/278)                                                  |

ITT, intention-to-treat; PP, per protocol; PU, peptic ulcer; NUD, non-ulcer dyspepsia; OAC, omeprazole, amoxicillin, clarithromycin; PAC, pantoprazole, amoxicillin, clarithromycin; RAC, rabeprazole, amoxicillin, clarithromycin; EAC, esomeprazole, amoxicillin, clarithromycin; CLO, campylobacter-like organism; UBT, urea breath test; LFT, lafutidine; LAC, labeprazole, amoxicillin, clarithromycin; PUD, peptic ulcer disease; QID, quarter in die; HP, *Helicobacter pylori*; YOGT, yogurt; SEQ, sequential therapy; O3WK, omeprazole 3 weeks; ECABET, ecabet sodium; PROB, probiotics; MUCOPROTECTIVE, mucoprotective agent; OALR, omeprazole, amoxicillin, levofloxacin, rifabutin; LA, levofloxacin, amoxicillin; TID, ter in die; TAILORED, tailored therapy; RAM, rabeprazole, amoxicillin, metronidazole; CONCO, concomitant therapy; EGC, early gastric cancer; PRE-SUSCEP, pre-susceptibility test; GC, gastric cancer; PAM, proton pump inhibitor (PPI), amoxicillin, metronidazole; PRO-NASE, pronase (protease); MALT, mucosa-associated lymphoid tissue.
