# Supplementary material for: Evidence based guidelines for the treatment of Helicobacter pylori infection in Korea 2020
Source: PubMed Central journal article supplement — Korean J Intern Med. 2021 Jun 8;36(4):807–38. doi: 10.3904/kjim.2020.701 (PMC8273819; doi:10.3904/kjim.2020.701), 2021-06-08
Supplement: kjim-2020-701-suppl4.pdf [file kjim-2020-701-suppl4.pdf]

**Supplementary Table 4. Evidence table about the eradication rate of ST in *Helicobacter pylori* infection**

| Study                                     | Country                  | Characteristic                                              | Intervention | Control    | Outcome (ITT)          | Outcome (PP)           |
|-------------------------------------------|--------------------------|-------------------------------------------------------------|--------------|------------|------------------------|------------------------|
| Gao et al. (2010) [94]                    | China                    | <i>H. pylori</i> positive patients                          | ST-10 days   | TT-7 days  | ST: 88.9%<br>TT: 80.6% |                        |
| Choi et al. (2012) [78]                   | South Korea              | <i>H. pylori</i> -associated gastritis or peptic ulcers     | ST-10 days   | TT-7 days  | ST: 75.6%<br>TT: 70.4% | ST: 82.0%<br>TT: 75.7% |
| Park et al. (2012) [79]                   | South Korea              | <i>H. pylori</i> infected patients                          | ST-10 days   | TT-7 days  | ST: 77.8%<br>TT: 62.2% | ST: 87.9%<br>TT: 76.0% |
| Oh et al. (2012) [80]                     | South Korea              | <i>H. pylori</i> infected patients                          | ST-10 days   | TT-7 days  | ST: 79.3%<br>TT: 63.0% | ST: 81.9%<br>TT: 64.5% |
| Lahbabi et al. (2013) [95]                | Morocco                  | <i>H. pylori</i> positive patients                          | ST-10 days   | TT-7 days  | ST: 94.2%<br>TT: 78.2% | ST: 96.0%<br>TT: 79.6% |
| Rakici et al. (2014) [96]                 | Turkey                   | <i>H. pylori</i> infected patients                          | ST-10 days   | TT-7 days  | ST: 84.9%<br>TT: 84.2% | ST: 85.9%<br>TT: 85.2% |
| Kim et al. (2016) [90]                    | South Korea              | <i>H. pylori</i> infected patients                          | ST-10 days   | TT-7 days  | ST: 82.4%<br>TT: 70.8% | ST: 88.8%<br>TT: 76.9% |
| Molina-Infante et al. (2010) [97]         | Spain                    | <i>H. pylori</i> positive patients                          | ST-10 days   | TT-10 days | ST: 76.5%<br>TT: 64.0% | ST: 80.8%<br>TT: 66.0% |
| Chung et al. (2012) [77]                  | South Korea              | Peptic ulcer diseases                                       | ST-10 days   | TT-10 days | ST: 75.9%<br>TT: 58.7% | ST: 86.8%<br>TT: 67.6% |
| Javid et al. (2013) [98]                  | India                    | Peptic ulcer diseases                                       | ST-10 days   | TT-10 days | ST: 76.0%<br>TT: 61.9% | ST: 84.6%<br>TT: 67.4% |
| Morse et al. (2013) [99]                  | Canada                   | <i>H. pylori</i> positive patients                          | ST-10 days   | TT-10 days | ST: 57.0%<br>TT: 55.0% | ST: 73.0%<br>TT: 59.0% |
| Zhou et al. (2014) [100]                  | China                    | <i>H. pylori</i> positive patients                          | ST-10 days   | TT-10 days | ST: 72.1%<br>TT: 66.4% | ST: 76.5%<br>TT: 72.7% |
| Lee et al. (2015) [101]                   | South Korea              | <i>H. pylori</i> infected patients                          | ST-10 days   | TT-10 days | ST: 79.0%<br>TT: 78.0% | ST: 84.9%<br>TT: 81.3% |
| Greenberg et al. (2011) [102]             | 7 Latin American country | <i>H. pylori</i> infected patients                          | ST-10 days   | TT-14 days | ST: 76.5%<br>TT: 82.2% | ST: 81.1%<br>TT: 87.1% |
| Kim et al. (2011) [75]                    | South Korea              | <i>H. pylori</i> infected patients                          | ST-10 days   | TT-14 days | ST: 85.9%<br>TT: 75.0% | ST: 92.6%<br>TT: 85.0% |
| Nasa et al. (2013) [103]                  | India                    | <i>H. pylori</i> infected patients                          | ST-10 days   | TT-14 days | ST: 88.2%<br>TT: 79.1% | ST: 92.4%<br>TT: 81.8% |
| Boal Carvalho et al. (2017) [104]         | Portugal                 | <i>H. pylori</i> infected patients                          | ST-10 days   | TT-14 days | ST: 86.2%<br>TT: 77.4% |                        |
| Liou et al. (2016) [105]                  | Taiwan                   | Subjects with <i>H. pylori</i> infection naïve to treatment | ST-10 days   | TT-14 days | ST: 87.2%<br>TT: 85.7% | ST: 91.6%<br>TT: 91.0% |
| Phiphatpatthamaamphan et al. (2016) [106] | Thailand                 | <i>H. pylori</i> infected gastritis patients                | ST-10 days   | TT-14 days |                        | ST: 97.9%<br>TT: 87.8% |
| Alsohaibani et al. (2015) [107]           | Saudi Arabia             | <i>H. pylori</i> infected patients                          | ST-10 days   | TT-14 days | ST: 62.3%<br>TT: 67.6% |                        |

Supplementary Table 4. Continued

| Study                         | Country   | Characteristic                                                  | Intervention | Control        | Outcome (ITT)           | Outcome (PP)            |
|-------------------------------|-----------|-----------------------------------------------------------------|--------------|----------------|-------------------------|-------------------------|
| Liu et al. (2014) [108]       | Hong Kong | <i>H. pylori</i> positive and treatment naïve patients          | ST-10 days   | BQT            | ST: 89.4%<br>BQT: 92.7% | ST: 95.2%<br>BQT: 98.8% |
| Kefeli et al. (2016) [109]    | Turkey    | Patients receiving first-line treatments for <i>H. pylori</i>   | ST-10 days   | BQT            | ST: 86.9%<br>BQT: 87.7% | ST: 95.0%<br>BQT: 94.2% |
| Sardarian et al. (2013) [110] | Iran      | Patients with peptic ulcer and naïve <i>H. pylori</i> infection | ST-10 days   | Hybrid-14 days | ST: 76.7%<br>H: 89.5%   | ST: 79.9%<br>H: 92.9%   |
| Chen et al. (2015) [111]      | Taiwan    | <i>H. pylori</i> infected patients who is naïve for treatment   | ST-10 days   | Hybrid-14 days | ST: 78.2%<br>H: 92.0%   | ST: 81.9%<br>H: 96.4%   |

ST, sequential therapy; ITT, intention-to-treat; PP, per protocol; TT, standard triple therapy; BQT, bismuth quadruple therapy; H, hybrid therapy.
