# Supplementary material for: Evidence based guidelines for the treatment of Helicobacter pylori infection in Korea 2020
Source: PubMed Central journal article supplement — Korean J Intern Med. 2021 Jun 8;36(4):807–38. doi: 10.3904/kjim.2020.701 (PMC8273819; doi:10.3904/kjim.2020.701), 2021-06-08
Supplement: kjim-2020-701-suppl5.pdf [file kjim-2020-701-suppl5.pdf]

**Supplementary Table 5. Studies included in meta-analysis about the eradication rate of CT in *Helicobacter pylori* eradication**

| Study                                 | Regimen |         |                 |              |         |                  | Comments                           |
|---------------------------------------|---------|---------|-----------------|--------------|---------|------------------|------------------------------------|
|                                       | CT      | SQT     | ST              | Triple (PAM) | BQT     | Hybrid           |                                    |
| Wu et al. (2010) [129]                | 10D-CT  | 10D-SQT |                 |              |         |                  |                                    |
| Molina-Infante et al. (2013) [113]    | 14D-CT  |         |                 |              |         | Hybrid therapy   |                                    |
| Lim et al. (2013) [127]               | 14D-CT  | 14D-SQT |                 |              |         |                  |                                    |
| Georgopoulos et al. (2013) [128]      | 10D-CT  |         | 10D-ST          |              |         |                  |                                    |
| Yasser et al. (2013) [132]            | 10D-CT  | 10D-SQT | 10D-ST          |              |         |                  |                                    |
| Heo et al. (2015) [122]               | 10D-CT  |         | 10D-ST          |              |         |                  |                                    |
| McNicholl et al. (2014) [126]         | 10D-CT  | 10D-SQT |                 |              |         |                  |                                    |
| De Francesco et al. (2014) [131]      | 14D-CT  |         |                 |              |         |                  |                                    |
| Gungor et al. (2015) [121]            | 10D-CT  | 10D-SQT | 14D-ST          | 14D-PAM      | 14D-BQT |                  |                                    |
| Heo et al. (2015) [122]               | 10D-CT  |         |                 |              |         | Hybrid           |                                    |
| Cuadrado-Lavin et al. (2015) [123]    | 10D-CT  |         | 10D-ST          |              |         | Hybrid (OA-OACM) |                                    |
| Molina-Infante et al. (2015) [124]    | 14D-CT  |         | 14D-ST          |              |         |                  |                                    |
| Ang et al. (2015) [125]               | 10D-CT  | 10D-SQT | 10D-ST          |              |         |                  |                                    |
| Hong et al. (2016) [114]              | 10D-CT  |         |                 |              |         |                  |                                    |
| Liou et al. (2016) [116]              | 10D-CT  |         | 14D-ST          |              | 10D-BQT |                  |                                    |
| Das et al. (2016) [117]               | 10D-CT  | 10D-SQT |                 |              |         |                  |                                    |
| Chung et al. (2016) [89]              | 10D-CT  | 10D-SQT | 10D-ST          |              |         |                  |                                    |
| Georgopoulos et al. (2016) [118]      | 10D-CT  | 10D-SQT |                 |              |         |                  |                                    |
| Kefeli et al. (2016) [109]            | 10D-CT  | 10D-SQT |                 |              | 10D-BQT |                  |                                    |
| Apostolopoulos et al. (2016) [119]    | 10D-CT  | 10D-SQT |                 |              |         |                  |                                    |
| Zhou et al. (2014) [100]              | 10D-CT  |         | Tailored triple |              | 10D-BQT |                  | Exclude (tailored triple)/BQT keep |
| Kim et al. (2017) [112]               | 10D-CT  | 10D-SQT |                 |              |         |                  |                                    |
| Park et al. (2017) [115] <sup>a</sup> | 10D CT  | 10D SQT |                 |              |         |                  | <sup>a</sup>                       |
| Park et al. (2017) [115] <sup>a</sup> | 14D-CT  | 14D-SQT |                 |              |         |                  | <sup>a</sup>                       |
| De Francesco et al. (2018) [130]      | 10D-CT  | 10D-SQT |                 |              | BQT     |                  |                                    |

CT, concomitant therapy; SQT, sequential; ST, standard triple; PAM, proton pump inhibitor (PPI) + amoxicillin + metronidazole; BQT, bismuth quadruple (PBMT); OA-OACM, omeprazole, amoxicillin-omeprazole, amoxicillin, clarithromycin, metronidazole.

<sup>a</sup>This study include both 10-day (10D) CT and 14-day (14D) CT.
