# Supplementary material for: Evidence based guidelines for the treatment of Helicobacter pylori infection in Korea 2020
Source: PubMed Central journal article supplement — Korean J Intern Med. 2021 Jun 8;36(4):807–38. doi: 10.3904/kjim.2020.701 (PMC8273819; doi:10.3904/kjim.2020.701), 2021-06-08
Supplement: kjim-2020-701-suppl6.pdf [file kjim-2020-701-suppl6.pdf]

**Supplementary Table 6. Pooled eradication rate of CT from randomized controlled trials with random effect model**

| Study protocol<br>(study no.)             | Intention-to-treat |                         |                          | Per protocol   |                         |                          |
|-------------------------------------------|--------------------|-------------------------|--------------------------|----------------|-------------------------|--------------------------|
|                                           | No. of<br>persons  | Effect size<br>(95% CI) | p value<br>(10D vs. 14D) | No. of persons | Effect size<br>(95% CI) | p value<br>(10D vs. 14D) |
| 10D-CT, overall<br>(n = 23) (ITT, n = 22) | 3,952              | 0.85 (0.82–0.88)        | 0.925                    | 3,609          | 0.91 (0.88–0.93)        | 0.278                    |
| 14D-CT, overall<br>(n = 6) (PP, n = 5)    | 854                | 0.86 (0.76–0.92)        |                          | 738            | 0.94 (0.88–0.97)        |                          |
| 10D-CT, Korea<br>(n = 7)                  | 1,451              | 0.84 (0.77–0.89)        | 0.274                    | 1,261          | 0.92 (0.88–0.94)        | 0.843                    |
| 14D-CT, Korea<br>(n = 2)                  | 164                | 0.79 (0.72–0.85)        |                          | 142            | 0.94 (0.50–0.99)        |                          |

CT, concomitant therapy; CI, confidence interval; ITT, intention-to-treat; PP, per protocol.
