# Supplementary material for: Evidence based guidelines for the treatment of Helicobacter pylori infection in Korea 2020
Source: PubMed Central journal article supplement — Korean J Intern Med. 2021 Jun 8;36(4):807–38. doi: 10.3904/kjim.2020.701 (PMC8273819; doi:10.3904/kjim.2020.701), 2021-06-08
Supplement: kjim-2020-701-suppl7.pdf [file kjim-2020-701-suppl7.pdf]

**Supplementary Table 7. Evidence table about PBMT in *Helicobacter pylori* eradication**

| Study                      | Intervention | Control                 | Intervention no. | Control no. | ITT          |          | PP           |         |
|----------------------------|--------------|-------------------------|------------------|-------------|--------------|----------|--------------|---------|
|                            |              |                         |                  |             | Intervention | Control  | Intervention | Control |
| Sapmaz et al. (2017) [143] | PBMT         | Modified dual therapy   | 100              | 100         | 87.8/100     | 84.7/100 | 87/98        | 83.2/98 |
| Liou et al. (2016) [116]   | PBMT         | Concomitant therapy     | 540              | 540         | 488/540      | 464/540  | 461/480      | 453/494 |
| Kefeli et al. (2016) [109] | PBMT         | Sequential therapy      | 130              | 130         | 114/130      | 113/130  | 114/121      | 113/119 |
| Gungor et al. (2015) [121] | PBMT         | Standard triple therapy | 100              | 100         | 62/100       | 42/100   | 62/80        | 42/87   |
| Songur et al. (2009) [144] | PBMT         | Standard triple therapy | 119              | 113         | 56/119       | 37/113   | 56/102       | 37/104  |

PBMT, bismuth quadruple therapy; ITT, intention-to-treat; PP, per protocol.
