# Supplementary material for: Evidence based guidelines for the treatment of Helicobacter pylori infection in Korea 2020
Source: PubMed Central journal article supplement — Korean J Intern Med. 2021 Jun 8;36(4):807–38. doi: 10.3904/kjim.2020.701 (PMC8273819; doi:10.3904/kjim.2020.701), 2021-06-08
Supplement: kjim-2020-701-suppl8.pdf [file kjim-2020-701-suppl8.pdf]

**Supplementary Table 8. Categorization of salvage regimens from overall 36 randomized controlled trials with 77 intervention arms**

| Category                            | Previous failed regimen                  | Salvage regimen                         | Interventions, n (number of intervention arms) |                                      |
|-------------------------------------|------------------------------------------|-----------------------------------------|------------------------------------------------|--------------------------------------|
| 2nd line, 23 studies, 47 arms       | PAC fail, 15 studies, 31 arms            | Bismuth quadruple, n = 12               | PBTM, n = 9 <sup>a</sup>                       |                                      |
|                                     |                                          |                                         | PBTA, n = 2                                    |                                      |
|                                     |                                          |                                         | PBMA, n = 2                                    |                                      |
|                                     |                                          |                                         | Quinolone triple, n = 9                        | PAL, n = 8 <sup>a</sup>              |
|                                     |                                          |                                         |                                                | PML, n = 1                           |
|                                     |                                          |                                         |                                                | Quinolone quadruple, n = 5           |
|                                     |                                          |                                         | Levo-bismuth + tetra (PBLT), n = 1             |                                      |
|                                     |                                          |                                         | Levo-sequential (PA-PML), n = 2                |                                      |
|                                     |                                          |                                         | Others, n = 4                                  | PAM, n = 2                           |
|                                     |                                          |                                         |                                                | PAT, n = 1                           |
|                                     | PATM, n = 1                              |                                         |                                                |                                      |
|                                     | Concomitant (PACM), n = 1                |                                         |                                                |                                      |
|                                     | PAM fail, 1 study, 2 arms                | PB + furazolidone + levofloxacin, n = 1 |                                                |                                      |
|                                     |                                          | PB + furazolidone + rlufoxacin, n = 1   |                                                |                                      |
|                                     | PAC/M fail, 2 studies, 4 arms            |                                         |                                                | Levo-bismuth (PBLA), n = 1           |
|                                     |                                          |                                         | PBTM, n = 1                                    |                                      |
|                                     |                                          |                                         | Furazolidone + PL, n = 1                       |                                      |
|                                     |                                          |                                         | Furazolidone + PB + doxycycline, n = 1         |                                      |
|                                     |                                          |                                         | Sequential (PA-PC + tinidazole), n = 1         |                                      |
|                                     | Triple, NS, 2 studies, 4 arms            |                                         | PBTM (tetracycline/doxycycline), n = 1         |                                      |
|                                     |                                          |                                         | PBTM, n = 1                                    |                                      |
|                                     |                                          |                                         | PM + moxifloxacin, n = 1                       |                                      |
|                                     |                                          |                                         | PBAC/M, 2 studies, 4 arms                      | Quintuple: PBTM + oxifloxacin, n = 1 |
| Quintuple: PBAC + tinidazole, n = 1 |                                          |                                         |                                                |                                      |
| NS, 2 studies, 5 arms               |                                          |                                         |                                                | PBAC, n = 1                          |
|                                     |                                          |                                         |                                                | PB + ofloxacin + azithromycin, n = 1 |
|                                     | PAL, n = 2                               |                                         |                                                |                                      |
|                                     | Levo-sequential (PA-PML), n = 1          |                                         |                                                |                                      |
|                                     | High dose dual (PA), n = 1               |                                         |                                                |                                      |
| 3rd line, 5 studies, 11 arms        | PAC-PAM fail, 3 studies, 7 arms          | Quinolone triple, n = 5                 | Sequential (PA-PCM), n = 1                     |                                      |
|                                     |                                          |                                         | PA + sitafloxacin, n = 2                       |                                      |
|                                     |                                          |                                         | PM + sitafloxacin, n = 1                       |                                      |
|                                     |                                          |                                         | PAL, n = 1                                     |                                      |
|                                     |                                          |                                         | PA + gatifloxacin, n = 1                       |                                      |
|                                     | PACM + quinolone fail, 2 studies, 4 arms |                                         | Dual (not high dose), n = 2                    | PA, n = 2                            |
|                                     |                                          |                                         |                                                | PBTM, n = 1                          |

**Supplementary Table 8. Continued**

| Category                          | Previous failed regimen                      | Salvage regimen | Interventions, n (number of intervention arms)                             |
|-----------------------------------|----------------------------------------------|-----------------|----------------------------------------------------------------------------|
|                                   |                                              |                 | PBMA, n = 1                                                                |
|                                   |                                              |                 | PB + minocycline + tinidazole, n = 1                                       |
|                                   |                                              |                 | PB + minocycline + rifabutin, n = 1                                        |
| Duration, 5 studies, 12 arms      | PAC fail, 3 studies                          |                 | PBTM, 7D vs. 14D, 3 studies <sup>a</sup>                                   |
|                                   | PAC/M fail, 1 study                          |                 | PAL, 7D vs. 10D, 1 study (levofloxacin 500 mg vs. 1,000 mg)                |
|                                   | PAC-PAM (sitafloxacin regimen) fail, 1 study |                 | PA + rifabutin, 10D vs. 14D, 1 study                                       |
| PPI comparison, 2 studies, 4 arms | PAC-PBTM fail, 1 study                       |                 | Rifabutin + amoxicillin 1g tid + PPI standard vs. double dose bid, 1 study |
|                                   | PAC fail, 1 study                            |                 | PBTM: rabeprazole vs. esomeprazole, 1 study                                |

PAC, pantoprazole, amoxicillin, clarithromycin; P, proton pump inhibitor; B, bismuth; T, tetracycline; M, metronidazole; A, amoxicillin; PAL, proton pump inhibitor (PPI), amoxicillin, levofloxacin; L, levofloxacin; AMX, amoxicillin; PAM, proton pump inhibitor (PPI) + amoxicillin + metronidazole; C, clarithromycin; NS, not significant; tid, three times per day; bid, twice per day.

<sup>a</sup>Included in the meta-analysis.
