# Supplementary material for: Evidence based guidelines for the treatment of Helicobacter pylori infection in Korea 2020
Source: PubMed Central journal article supplement — Korean J Intern Med. 2021 Jun 8;36(4):807–38. doi: 10.3904/kjim.2020.701 (PMC8273819; doi:10.3904/kjim.2020.701), 2021-06-08
Supplement: kjim-2020-701-suppl9.pdf [file kjim-2020-701-suppl9.pdf]

**Supplementary Table 9. Evidence table of 16 randomized controlled trials which were included in the meta-analysis of regimens for salvage therapy**

| No. | Study                     | No. of subjects                                                  | No. of intervention    | No. of comparator | Results                                                                                                                                                                         | Conclusion                                                                                                                                                                                                                                                                                       |
|-----|---------------------------|------------------------------------------------------------------|------------------------|-------------------|---------------------------------------------------------------------------------------------------------------------------------------------------------------------------------|--------------------------------------------------------------------------------------------------------------------------------------------------------------------------------------------------------------------------------------------------------------------------------------------------|
| 383 | Kuo et al. (2009) [175]   | Dyspepsia, failed 1st-line standard triple (166)                 | EAL (83)               | EBTM (83)         | ITT: EBTM, 63.9% (95% CI, 53.6–74.2) vs. EAL, 69.9% (95% CI, 60.1–79.7) ( $p = 0.89$ )<br>PP: EBTM, 84.1% (95% CI, 75.1–93.1) vs. EAL, 75.3% (95% CI, 65.8–84.8) ( $p = 0.82$ ) | The EAL regimen can achieve an efficacy similar to that of the standard EBTM therapy.                                                                                                                                                                                                            |
| 316 | Wu et al. (2011) [167]    | Failed 1st-line standard triple (120)                            | EBTA (58)              | EBTM (62)         | ITT: EBTA, 62% (95% CI, 50–75) vs. EBTM, 81% (95% CI, 71–91) ( $p = 0.02$ )<br>PP: EBTA, 64% (95% CI, 52–76) vs. EBTM, 83% (95% CI, 74–92) ( $p = 0.01$ )                       | EBTA quadruple therapy demonstrated a lower eradication rate than standard EBTM therapy in second-line rescue treatment.                                                                                                                                                                         |
| 266 | Chuah et al. (2012) [165] | Peptic ulcer or gastritis, failed 1st-line standard triple (101) | LAE (51)               | EMBT (50)         | ITT: LAE, 86.3% (95% CI, 76.5–96.1) vs. EBTM, 86% (95% CI, 76–96) ( $p > 0.05$ )<br>PP: LAE, 93.6% (95% CI, 86–99.8) vs. EAL, 91.8% (95% CI, 83.2–98.5) ( $p > 0.05$ )          | A 14D levofloxacin/amoxicillin/esomeprazole triple therapy approach provides a > 90% per-protocol report.                                                                                                                                                                                        |
| 432 | Uygun et al. (2008) [179] | Non-ulcer dyspepsia, failed 1st-line standard triple 14D (278)   | LBMA (91)<br>LBTA (92) | LBMT (95)         | ITT: LBMA, 68% vs. LBTA, 75% vs. LBMT, 78%<br>PP: LBMA, 74.7% vs. LBTA, 81.5% vs. LBMT, 82.1% ( $p > 0.05$ )                                                                    | A 14D regimen of lansoprazole, bismuth subcitrate and antibiotic pairs, tetracycline–amoxicillin and tetracycline–metronidazole, is an effective quadruple therapy after one failed course of standard triple therapy.                                                                           |
| 144 | Jheng et al. (2015) [156] | Failed 1st-line standard triple 7D (124)                         | RATM (61)              | RBTM (63)         | ITT: RATM, 90.2% vs. RBTM, 92.1% ( $p = 0.71$ )<br>PP: RATM, 89.3% vs. RBTM, 93.3% ( $p = 0.44$ )                                                                               | The 10D RATM treatment could be an alternative rescue therapy in bismuth-unavailable countries.                                                                                                                                                                                                  |
| 408 | Jung et al. (2008) [182]  | PUD, CAG, or CG, failed 1st-line standard triple (76)            | LAP (31)               | MTPB (45)         | ITT: LAP, 51.6% vs. MTPB, 48.9% ( $p = 0.815$ )<br>PP: LAP, 53.3% vs. MTPB, 62.9% ( $p = 0.437$ )                                                                               | <i>Helicobacter pylori</i> eradication rates of levofloxacin-based triple therapy and bismuth-based quadruple therapy were not significantly different in second-line <i>H. pylori</i> eradication therapy, and low incidence of side effects was observed in levofloxacin-based triple therapy. |
| 356 | Lee et al. (2010) [172]   | Failed 1st-line standard triple (227)                            | EBTM (112)             | EBTM (115)        | ITT: EBTM 7D, 64.3% vs. EBTM 14D, 82.6% ( $p = 0.002$ )<br>PP: EBTM, 7D, 77.2% vs. EBTM 14D 93.6% ( $p = 0.001$ )                                                               | Two-week bismuth-containing quadruple therapy was more effective than the 1-week treatment.                                                                                                                                                                                                      |

Supplementary Table 9. Continued

| No.  | Study                           | No. of subjects                                 | No. of intervention | No. of comparator | Results                                                                                                                                                                                                                 | Conclusion                                                                                                                                                                                           |
|------|---------------------------------|-------------------------------------------------|---------------------|-------------------|-------------------------------------------------------------------------------------------------------------------------------------------------------------------------------------------------------------------------|------------------------------------------------------------------------------------------------------------------------------------------------------------------------------------------------------|
| 305  | Chung et al. (2011) [170]       | Failed 1st-line standard triple (199)           | PBMT (98)           | PBMT (101)        | ITT: PBMT 7D, 81.6% (95% CI, 73.9–89.3) vs. PBMT 14D, 85.1% (95% CI, 78.2–92.0) ( $p = 0.028$ )<br>PP: PBMT 7D, 89.6% (95% CI, 83.2–96.0) vs. PBMT 14D, 96.2% (95% CI, 92.0–100.0) ( $p = 0.015$ )                      | Although PBMT7 was not inferior to PBMT14 statistically, PBMT could not demonstrate enough ITT/PP eradication rate.                                                                                  |
| 979  | Yoon et al. (2012) [164]        | Failed 1st-line standard triple (169)           | PBMT (85)           | PBMT (84)         | ITT: PBMT 7D, 83.5% vs. PBMT 14D, 87.7% ( $p = 0.74$ )<br>PP: PBMT 7D, 87.7% vs. PBMT 14D, 88.9% ( $p = 0.70$ )                                                                                                         | One-week bismuth-containing quadruple therapy can be as effective as a 2-week therapy after the failure of the first-line eradication therapy.                                                       |
| 913  | Moon et al. (2013) [161]        | Failed 1st-line standard triple (113)           | LML (56)            | LBMT (57)         | ITT: LML, 67.9% vs. LBMT, 84.2% ( $p = 0.042$ )<br>PP: LML, 73.1% vs. LBMT, 92.3% ( $p = 0.010$ )                                                                                                                       | LML therapy is less effective than quadruple therapy as a second-line treatment for <i>H. pylori</i> infection.                                                                                      |
| 1199 | Karatapanis et al. (2009) [176] | Dyspepsia, failed 1st-line standard triple (76) | LAL (39)            | LBMT (38)         | ITT: LAL, 94.7% (95% CI, 83.0–99.4) vs. LBMT, 78.9% (95% CI, 62.7–90.4) ( $p < 0.05$ )<br>PP: LAL, 97.3% (95% CI, 86.2–99.9) vs. LBMT, 85.7% (95% CI, 69.7–95.1) ( $p > 0.05$ )                                         | A 10D course of levofloxacin triple therapy appeared to be more effective and better tolerated than a 10D bismuth-based quadruple therapy in the treatment of persistent <i>H. pylori</i> infection. |
| 252  | Kuo et al. (2013) [162]         | Failed 1st-line standard triple (150)           | EBTL (76)           | EBTM (74)         | ITT: EBTL, 78.9% (95% CI, 69.7–88.1) vs. EBTM, 79.7% (95% CI, 70.5–88.7) ( $p > 0.05$ )<br>PP: EBTL, 87.0% (95% CI, 79.4–94.9) vs. EBTM, 90.8% (95% CI, 83.8–97.8) ( $p > 0.05$ )                                       | The 10D bismuth quadruple therapies with high-dose metronidazole or levofloxacin were effective even in areas with high resistance.                                                                  |
| 6    | Wu et al. (2017) [147]          | Dyspepsia, failed 1st-line standard triple (73) | RBAL (38)           | RAL (35)          | ITT: RBAL, 80.0% vs. RAL, 60.5%<br>mITT: RBAL, 84.8% (95% CI, 72.6–97.1) vs. RAL, 67.6% (95% CI, 51.9–83.4) ( $p = 0.0987$ )<br>PP: RBAL, 84.4% (95% CI, 71.8–97.0) vs. RAL, 66.7% (95% CI, 50.6–82.8) ( $p = 0.0975$ ) | Adding bismuth subcitrate to levofloxacin-based triple therapy was not more effective than not doing so.                                                                                             |
| 85   | Chuah et al. (2016) [152]       | Failed 1st-line standard triple (164)           | EALM (82)           | EAL (82)          | ITT: EALM, 90.2% (95% CI, 83.7–96.8) vs. EAL, 80.5% (95% CI, 71.7–89.2) ( $p = 0.077$ )<br>PP: EALM, 91.4% (95% CI, 85.1–97.6) vs. EAL, 81.5% (95% CI, 72.8–90.1) ( $p = 0.067$ )                                       | Levofloxacin and metronidazole-containing sequential therapy achieved a > 90% eradication rate as a second-line <i>H. pylori</i> therapy.                                                            |

Supplementary Table 9. Continued

| No. | Study                     | No. of subjects                                                                   | No. of intervention | No. of comparator | Results                                                                                          | Conclusion                                                                                                                                                                     |
|-----|---------------------------|-----------------------------------------------------------------------------------|---------------------|-------------------|--------------------------------------------------------------------------------------------------|--------------------------------------------------------------------------------------------------------------------------------------------------------------------------------|
| 280 | Chuah et al. (2012) [166] | PUD or gastritis, failed 1st-line standard triple (128)                           | EAT (64)            | EAL (64)          | ITT: EAT, 75.0% vs. EAL, 78.1% ( $p = 0.676$ )<br>PP: EAT, 80.0% vs. EAL, 80.3% ( $p = 0.964$ )  | The efficacy of 14D EAT regimens attained an unacceptable report card of 75% eradication rates in intention-to-treat analysis and was not even superior to the 7D EAL regimen. |
| 304 | Hu et al. (2011) [168]    | PUD, gastritis, or normal endoscopy finding, failed 1st-line standard triple (90) | EAM (45)            | EAL (45)          | ITT: EAM, 84.4% vs. EAL, 68.9% ( $p = 0.134$ )<br>PP: EAM, 88.4% vs. EAL, 75.63% ( $p = 0.160$ ) | The 14D EAM regimen was not inferior to the 7D EAL regimen for second-line anti- <i>H. pylori</i> therapy in Taiwan.                                                           |

E, esomeprazole; A, amoxicillin; L, levofloxacin; B, bismuth; T, tetracycline; M, metronidazole; ITT, intention-to-treat; CI, confidence interval; PP, per protocol; R, rabeprazole; PUD, peptic ulcer disease; CAG, chronic atrophic gastritis; CG, chronic gastritis; P, proton pump inhibitor; mITT, modified ITT.
