# Supplementary material for: Evidence based guidelines for the treatment of Helicobacter pylori infection in Korea 2020
Source: PubMed Central journal article supplement — Korean J Intern Med. 2021 Jun 8;36(4):807–38. doi: 10.3904/kjim.2020.701 (PMC8273819; doi:10.3904/kjim.2020.701), 2021-06-08
Supplement: kjim-2020-701-suppl10.pdf [file kjim-2020-701-suppl10.pdf]

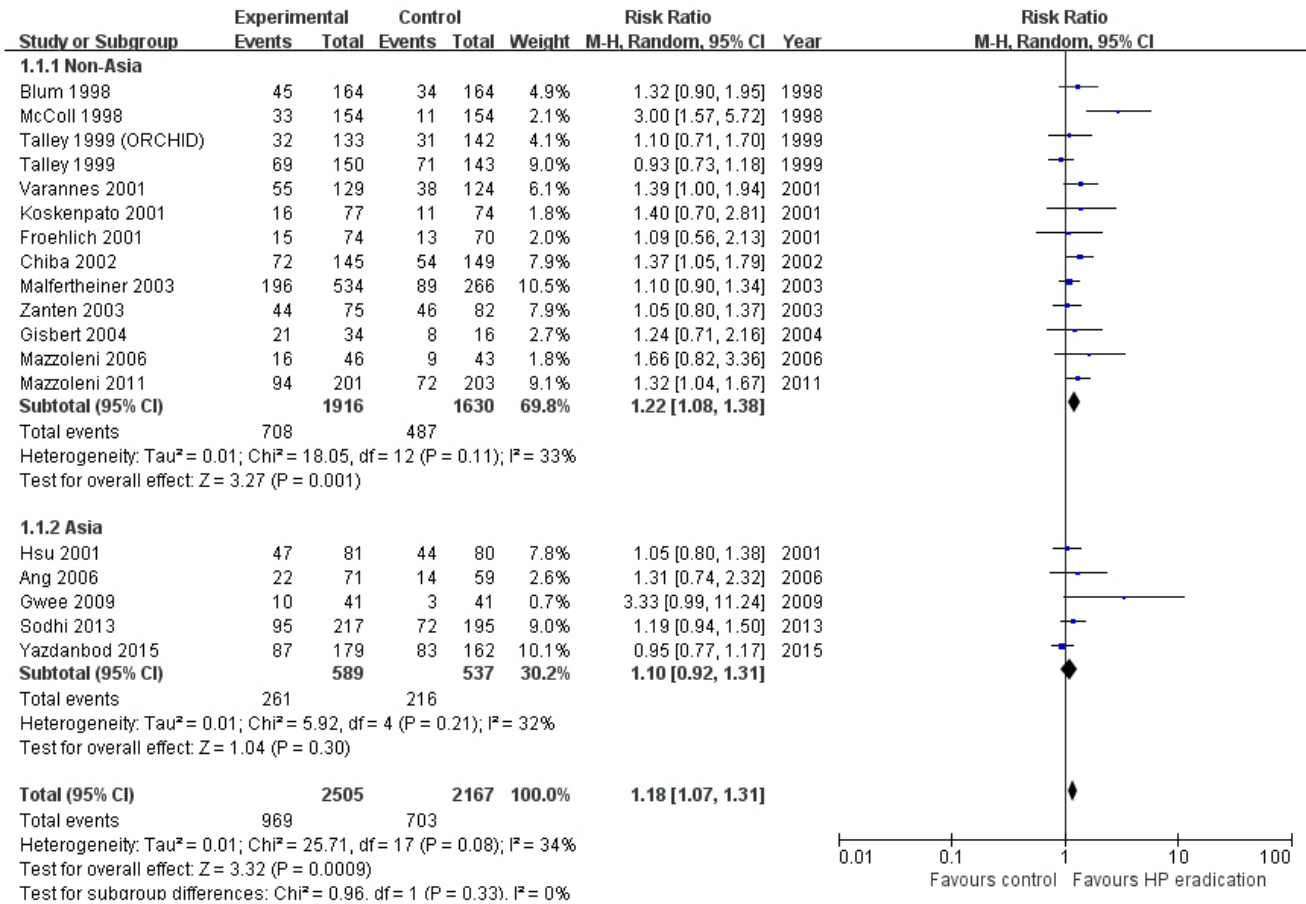

**Supplementary Figure 1.** Meta-analysis of efficacy of *Helicobacter pylori* (HP) eradication in patients with functional dyspepsia. M-H, Mantel-Haenszel; CI, confidence interval.
