# Supplementary material for: Evidence based guidelines for the treatment of Helicobacter pylori infection in Korea 2020
Source: PubMed Central journal article supplement — Korean J Intern Med. 2021 Jun 8;36(4):807–38. doi: 10.3904/kjim.2020.701 (PMC8273819; doi:10.3904/kjim.2020.701), 2021-06-08
Supplement: kjim-2020-701-suppl11.pdf [file kjim-2020-701-suppl11.pdf]

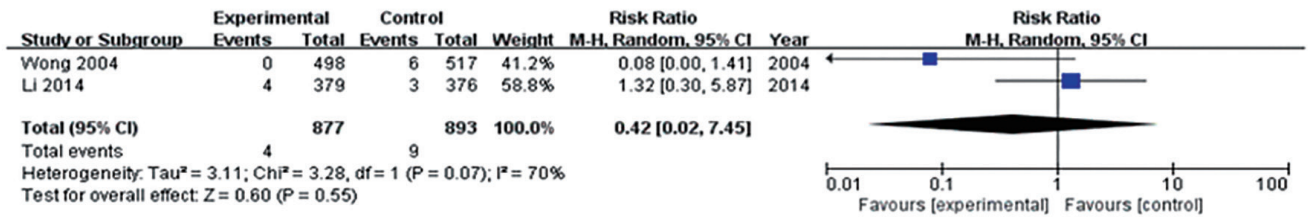

**A**

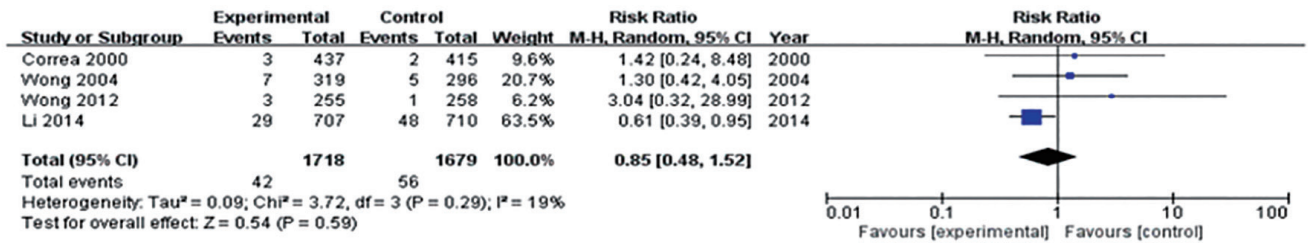

**B**

**Supplementary Figure 2.** Meta-analysis of effect of *Helicobacter pylori* eradication on gastric cancer development. (A) Forest plot of studies reporting gastric cancer in eradication group and control group in subjects with no precancerous lesions at baseline. (B) Forest plot of studies reporting gastric cancer in eradication group and control group in subjects with atrophic gastritis, intestinal metaplasia, and dysplasia at baseline. M-H, Mantel-Haenszel; CI, confidence interval.
