# Supplementary material for: Evidence based guidelines for the treatment of Helicobacter pylori infection in Korea 2020
Source: PubMed Central journal article supplement — Korean J Intern Med. 2021 Jun 8;36(4):807–38. doi: 10.3904/kjim.2020.701 (PMC8273819; doi:10.3904/kjim.2020.701), 2021-06-08
Supplement: kjim-2020-701-suppl12.pdf [file kjim-2020-701-suppl12.pdf]

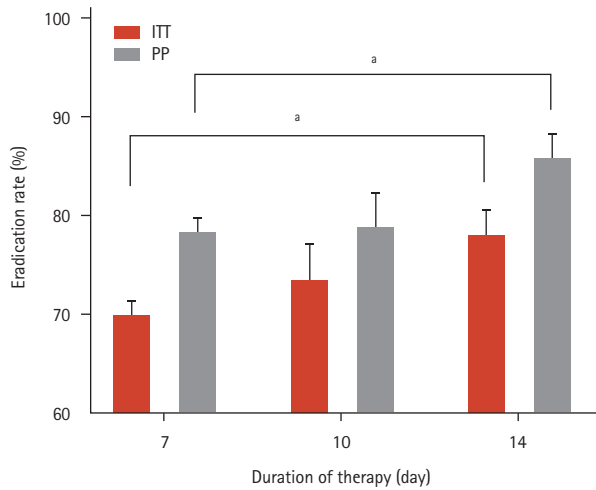

**Supplementary Figure 3.** Pooled eradication rates of standard triple therapy by treatment duration from randomized controlled trials performed in Korea. Eradication rates of standard triple therapy (TT)-7 were 70.0% (95% confidence interval [CI], 68.5% to 71.4%) in intention-to-treat (ITT) analysis and 78.4% (95% CI, 77.0% to 79.7%) in per protocol (PP) analysis. Eradication rates of TT-10 were 73.7% (95% CI, 69.8% to 77.2%) in ITT analysis and 78.9% (95% CI, 74.9% to 82.4%) in PP analysis. Eradication rates of TT-14 were 78.1% (95% CI, 75.2% to 80.7%) in ITT analysis and 86.0% (95% CI, 83.4% to 88.3%) in PP analysis. <sup>a</sup> $p < 0.05$ .
