# Supplementary material for: Evidence based guidelines for the treatment of Helicobacter pylori infection in Korea 2020
Source: PubMed Central journal article supplement — Korean J Intern Med. 2021 Jun 8;36(4):807–38. doi: 10.3904/kjim.2020.701 (PMC8273819; doi:10.3904/kjim.2020.701), 2021-06-08
Supplement: kjim-2020-701-suppl13.pdf [file kjim-2020-701-suppl13.pdf]

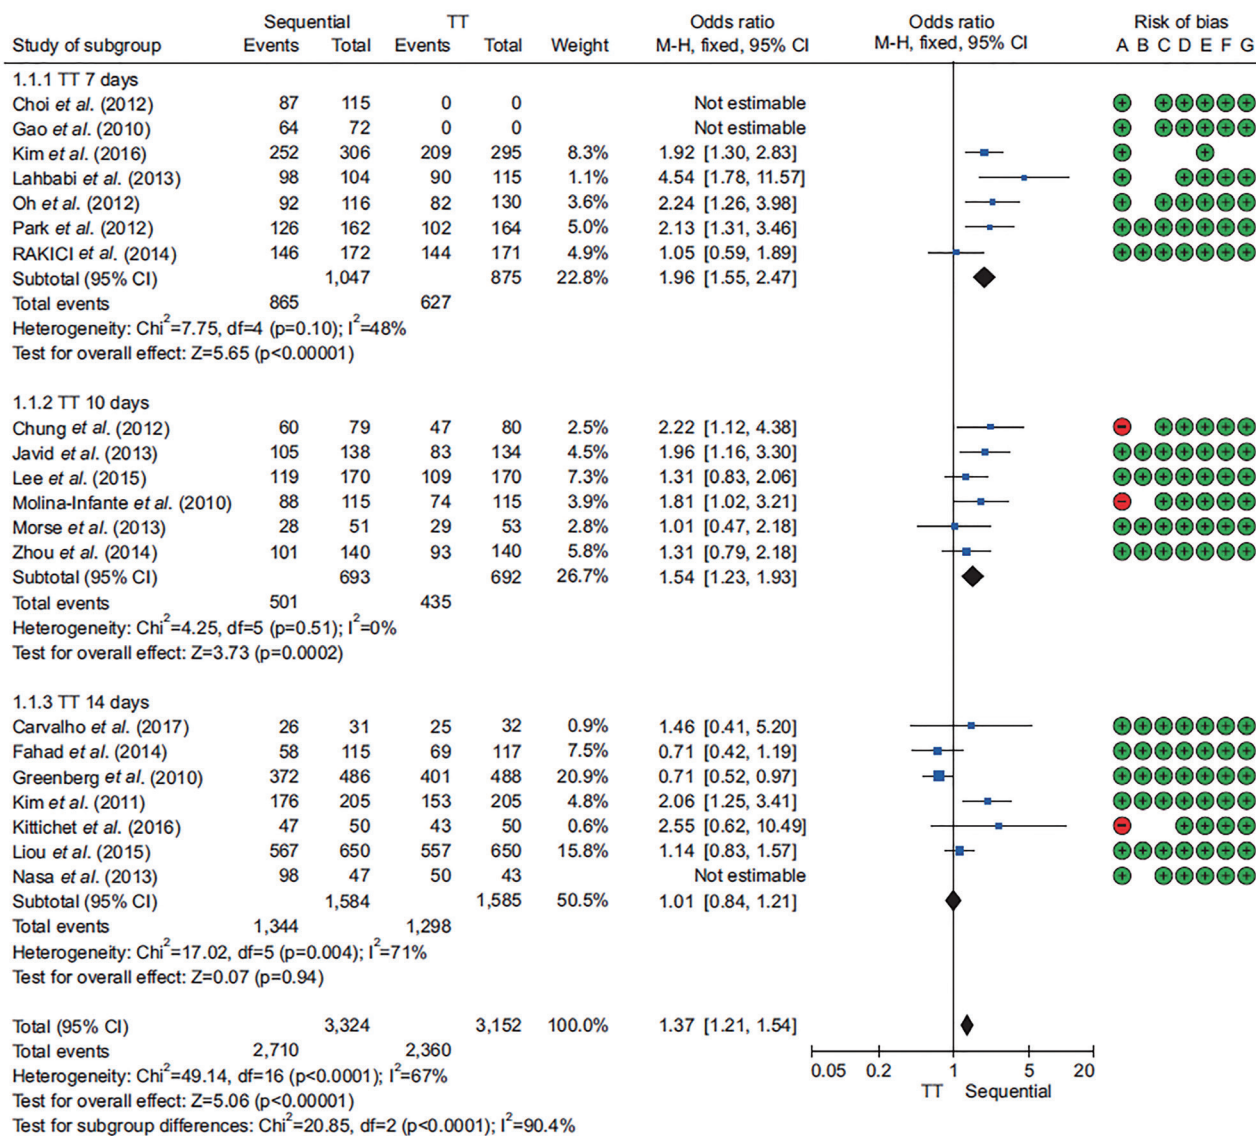

**Supplementary Figure 4.** Meta-analysis comparing between 10-day sequential therapy and standard triple therapy (TT; per protocol analysis). Risk of bias: A, random sequence generation (selection bias); B, allocation concealment (selection bias); C, blinding of participants and personnel (performance bias); D, blinding of outcome assessment (detection bias); E, incomplete outcome data (attrition bias); F, selective reporting (reporting bias); G, other bias. M-H, Mantel-Haenszel; CI, confidence interval.
