# Supplementary material for: Evidence based guidelines for the treatment of Helicobacter pylori infection in Korea 2020
Source: PubMed Central journal article supplement — Korean J Intern Med. 2021 Jun 8;36(4):807–38. doi: 10.3904/kjim.2020.701 (PMC8273819; doi:10.3904/kjim.2020.701), 2021-06-08
Supplement: kjim-2020-701-suppl17.pdf [file kjim-2020-701-suppl17.pdf]

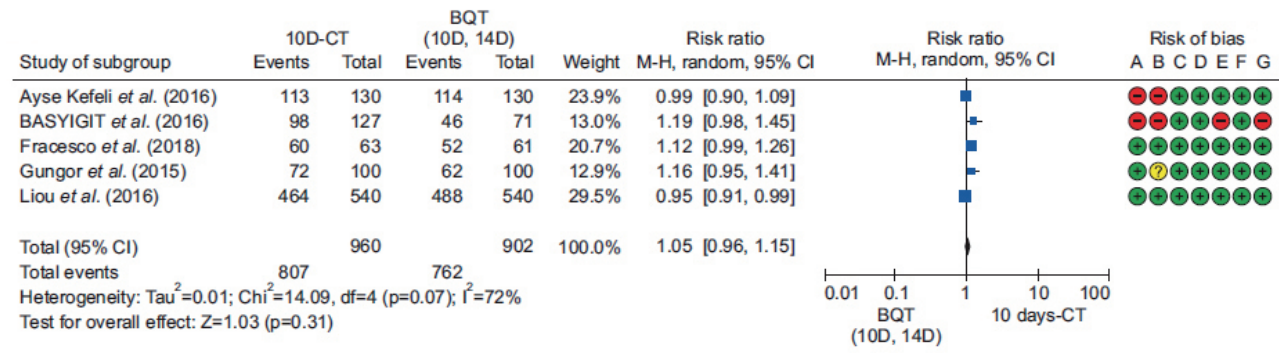

**A**

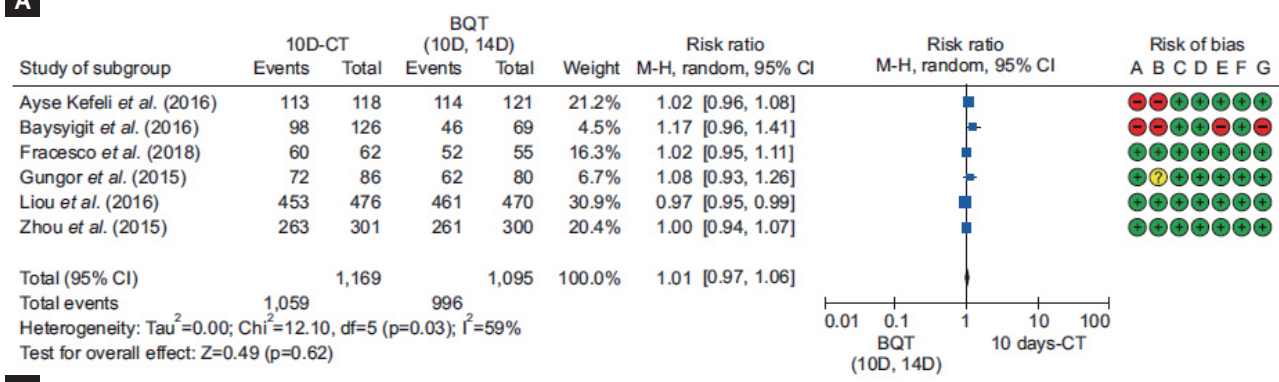

**B**

**Supplementary Figure 8.** Comparison between 10-day concomitant therapy and 10-/14-day bismuth quadruple therapy (A) intention-to-treat analysis (B) per protocol analysis Risk of bias: A, random sequence generation (selection bias); B, allocation concealment (selection bias); C, blinding of participants and personnel (performance bias); D, blinding of outcome assessment (detection bias); E, incomplete outcome data (attrition bias); F, selective reporting (reporting bias); G, other bias. CT, concomitant therapy; BQT, bismuth quadruple therapy; M-H, Mantel-Haenszel; CI, confidence interval.
